# Supplementary material
Source: PubMed Central journal article supplement (PMC4895205)
Supplement: NIHMS790927-supplement-2.pdf [file NIHMS790927-supplement-2.pdf]

## Supporting Information

### Semisynthetic Studies on the Manzamine Alkaloids

Khalid A. El Sayed,<sup>†‡</sup> Ashraf A. Khalil,<sup>†§</sup> Muhammad Yousaf,<sup>†</sup> Guillermo Labadie,<sup>⊥</sup>  
Mahesh K. Gundluru,<sup>⊥</sup> Scott G. Franzblau,<sup>¶</sup> Alejandro M.S. Mayer,<sup>□</sup> Mitchell A.  
Avery,<sup>⊥</sup> and Mark T. Hamann<sup>†\*</sup>

*Department of Pharmacognosy and Department of Medicinal Chemistry, School of  
Pharmacy, The University of Mississippi, University, MS 38677, Institute for  
Tuberculosis Research, College of Pharmacy, University of Illinois at Chicago, Chicago,  
IL 60612, and Department of Pharmacology, Chicago College of Osteopathic Medicine,  
Midwestern University, Downers Grove, Illinois 60515*

\* To whom correspondence should be addressed. Tel: 662-915-5730. Fax: 662-915-6975.  
E-mail: mthamann@olemiss.edu

<sup>†</sup> Department of Pharmacognosy, University of Mississippi.

<sup>‡</sup> Current address: Department of Basic Pharmaceutical Sciences, College of Pharmacy,  
University of Louisiana at Monroe, Monroe, Louisiana 71209.

<sup>§</sup> Current address: College of Clinical Pharmacy, King Faisal University, Al-Ahsa 31982  
Saudi Arabia.

<sup>⊥</sup> Department of Medicinal Chemistry, University of Mississippi.

<sup>¶</sup> University of Illinois at Chicago.

<sup>□</sup> Midwestern University.

## Table of Contents

|                                                                                             | Page number |
|---------------------------------------------------------------------------------------------|-------------|
| <b>Scheme S1.</b> Plausible mechanism of formation of compounds <b>6</b> and <b>9</b> ..... | 3           |
| <b>Scheme S2.</b> Plausible mechanism of formation of compound <b>17</b> .....              | 4           |

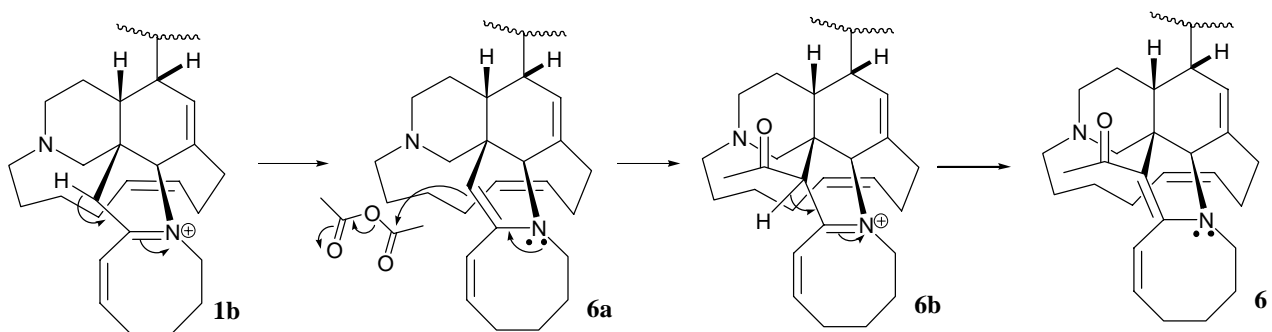

**Scheme S1.** Plausible mechanism of formation of compounds **6** and **9**.

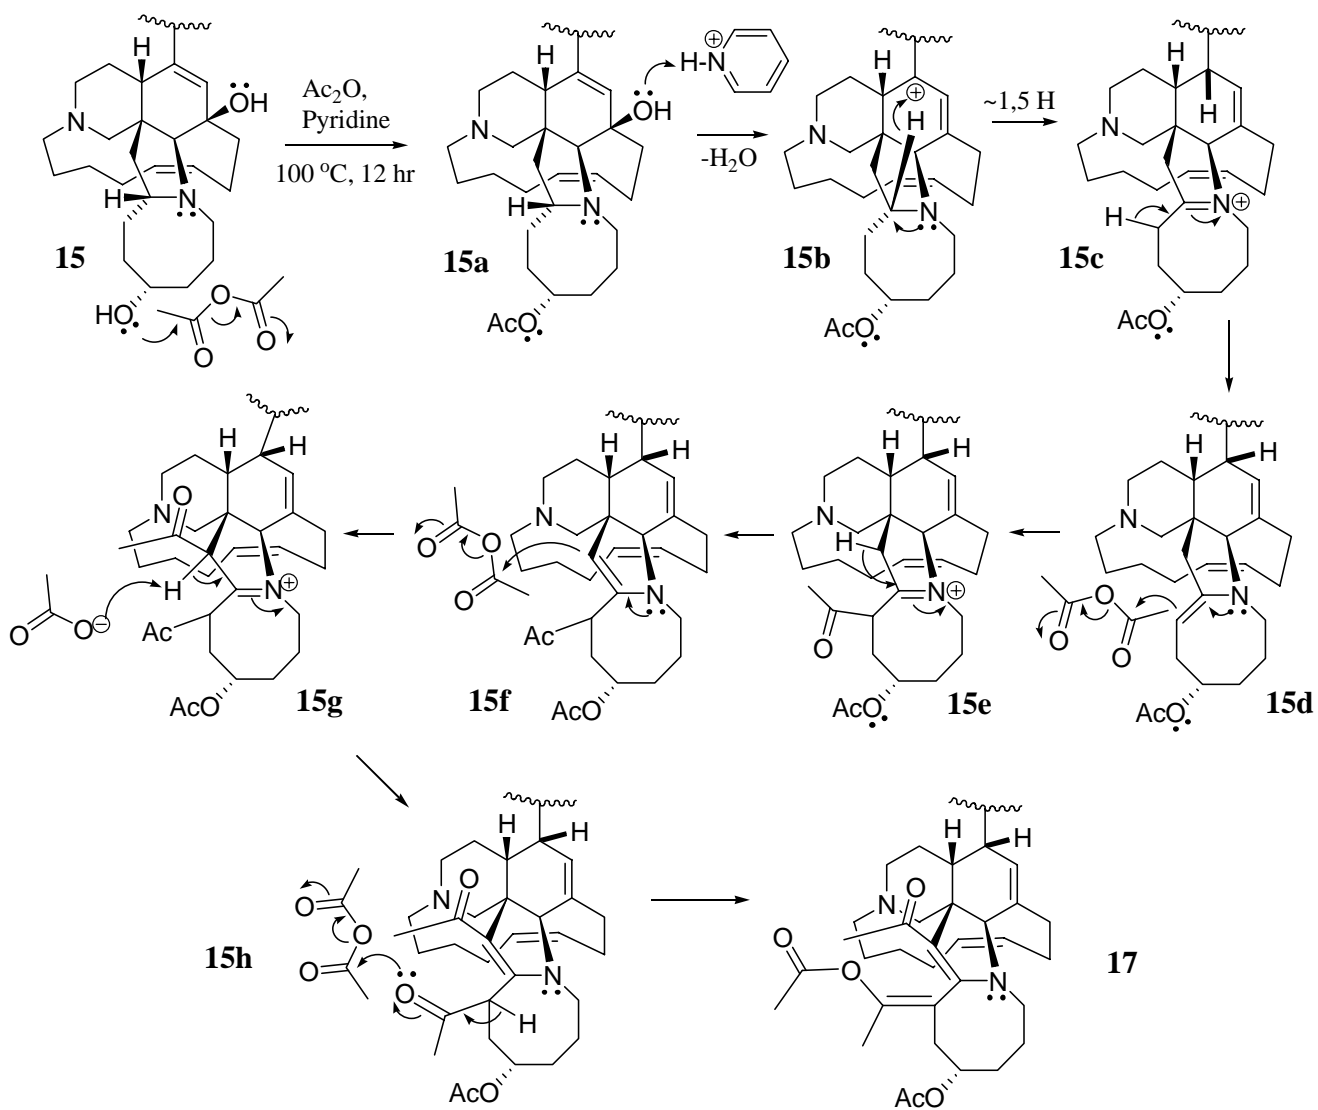

**Scheme S2.** Plausible mechanism of formation of compound **17**.
